# Supplementary material
Source: PubMed Central journal article supplement (PMC4921237)
Supplement: NIHMS26147-supplement-01.pdf [file NIHMS26147-supplement-01.pdf]

*Lhx6-GFP* transgenic embryos

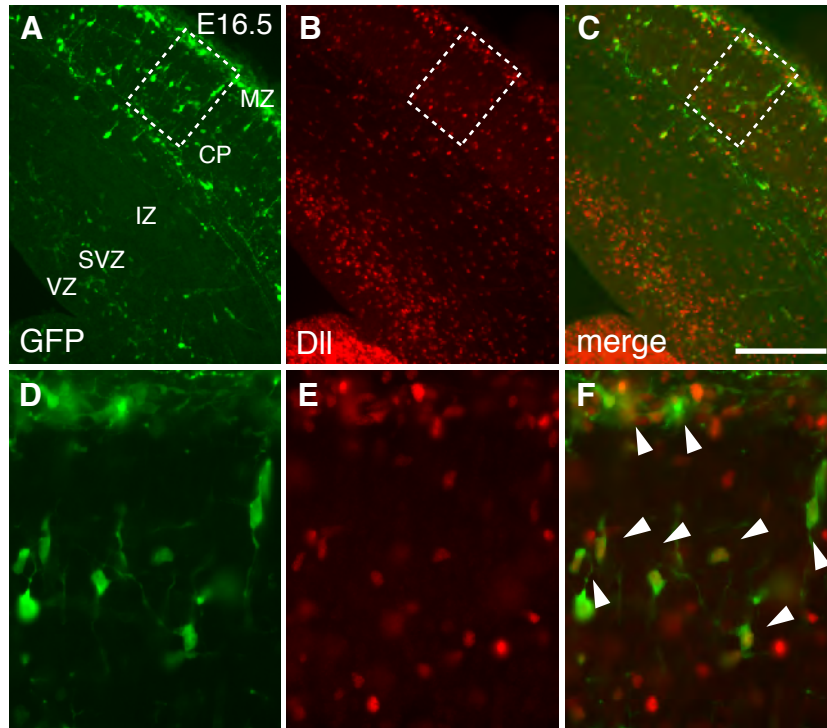

Dissociated cells from *Lhx6-GFP* neocortex

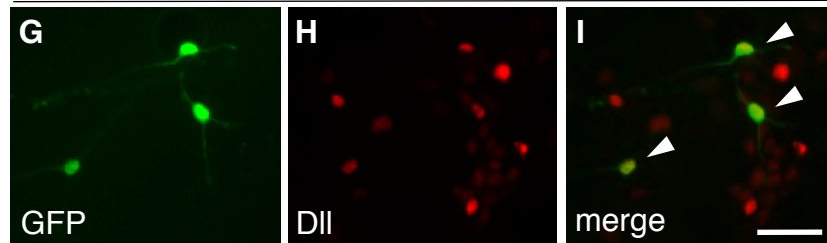

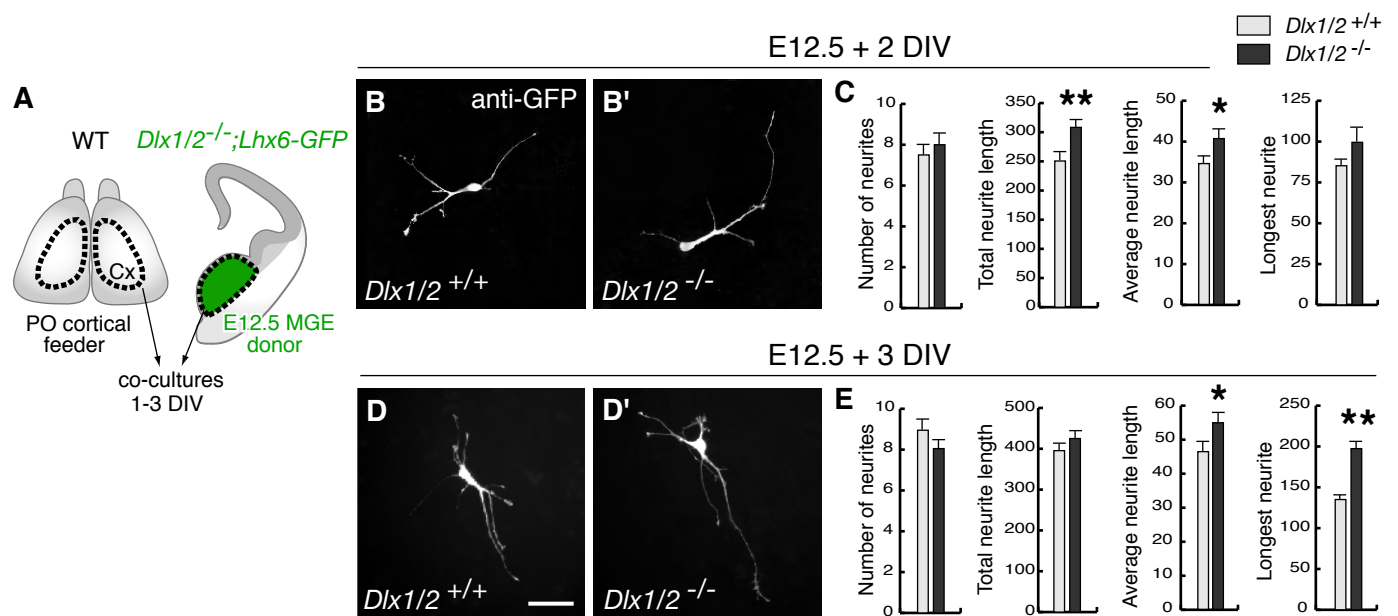

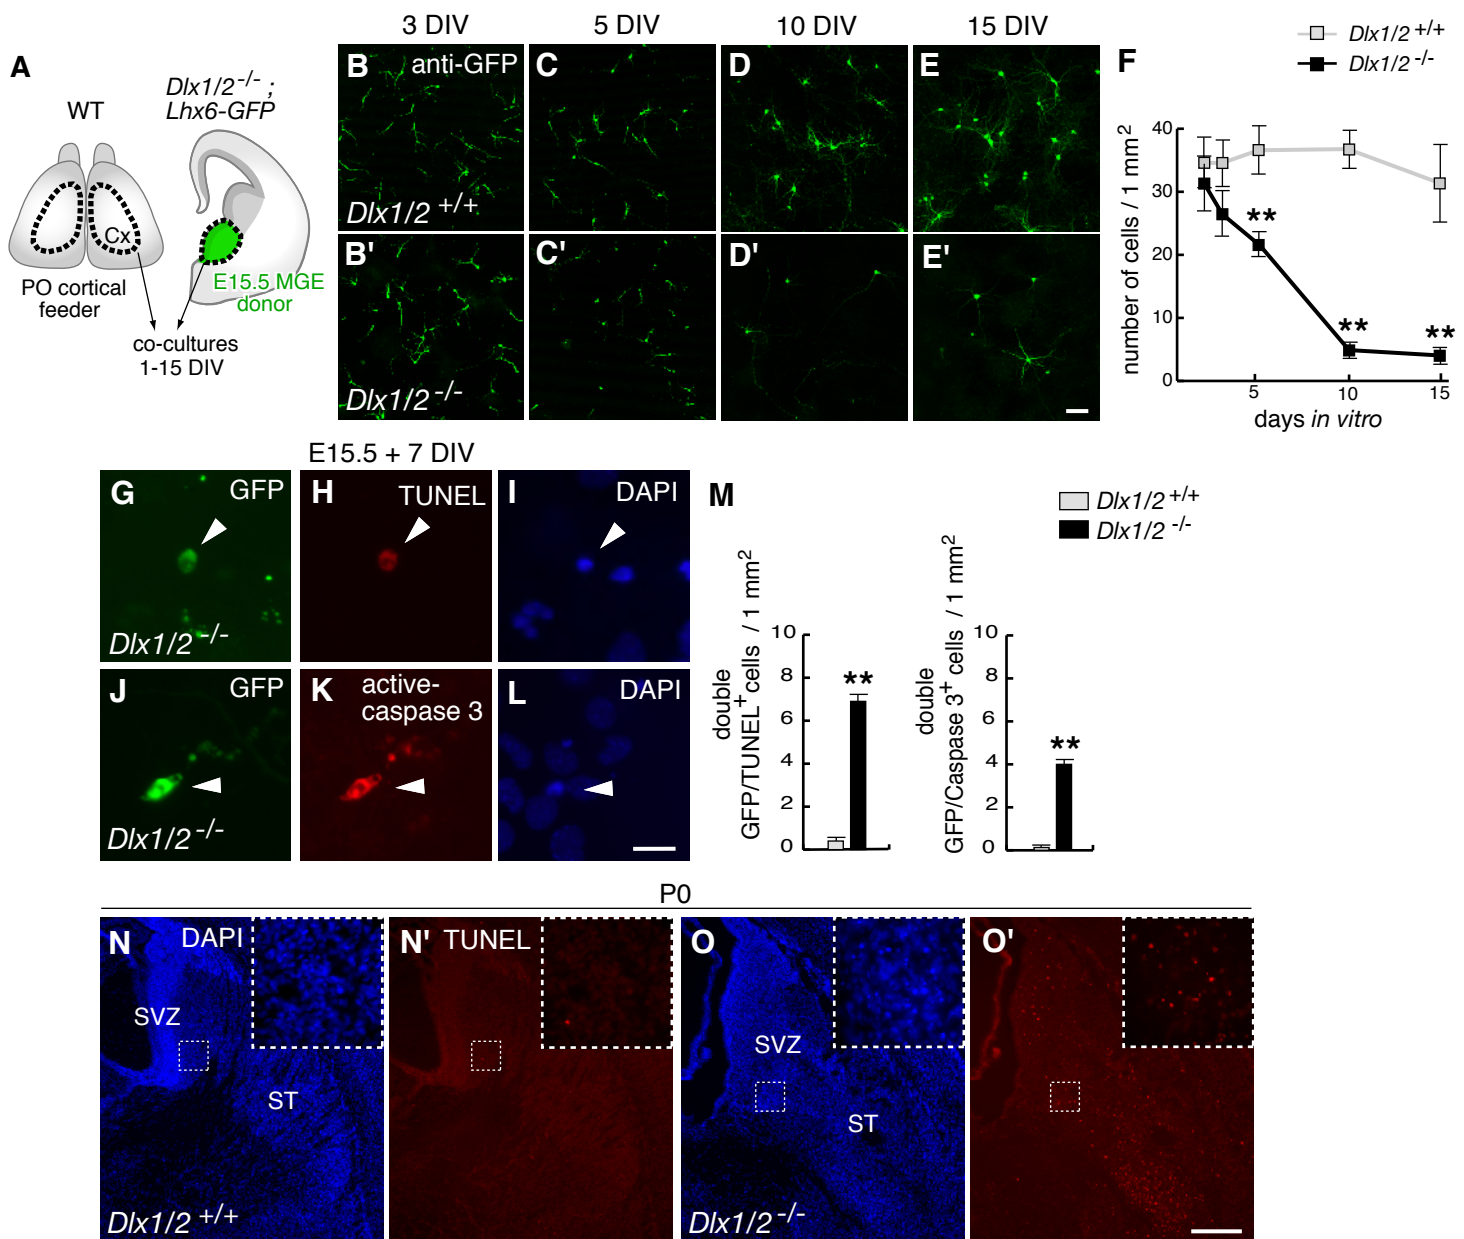

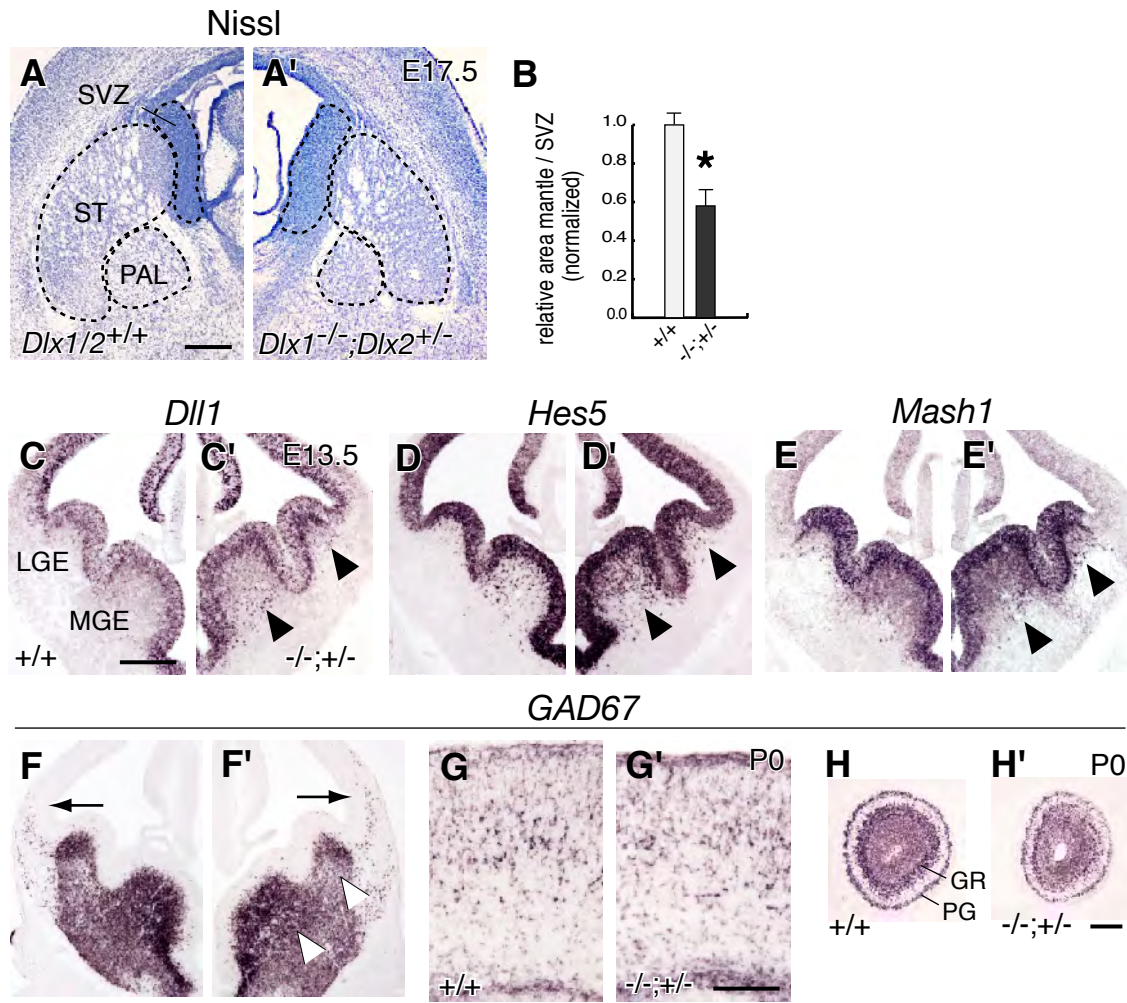

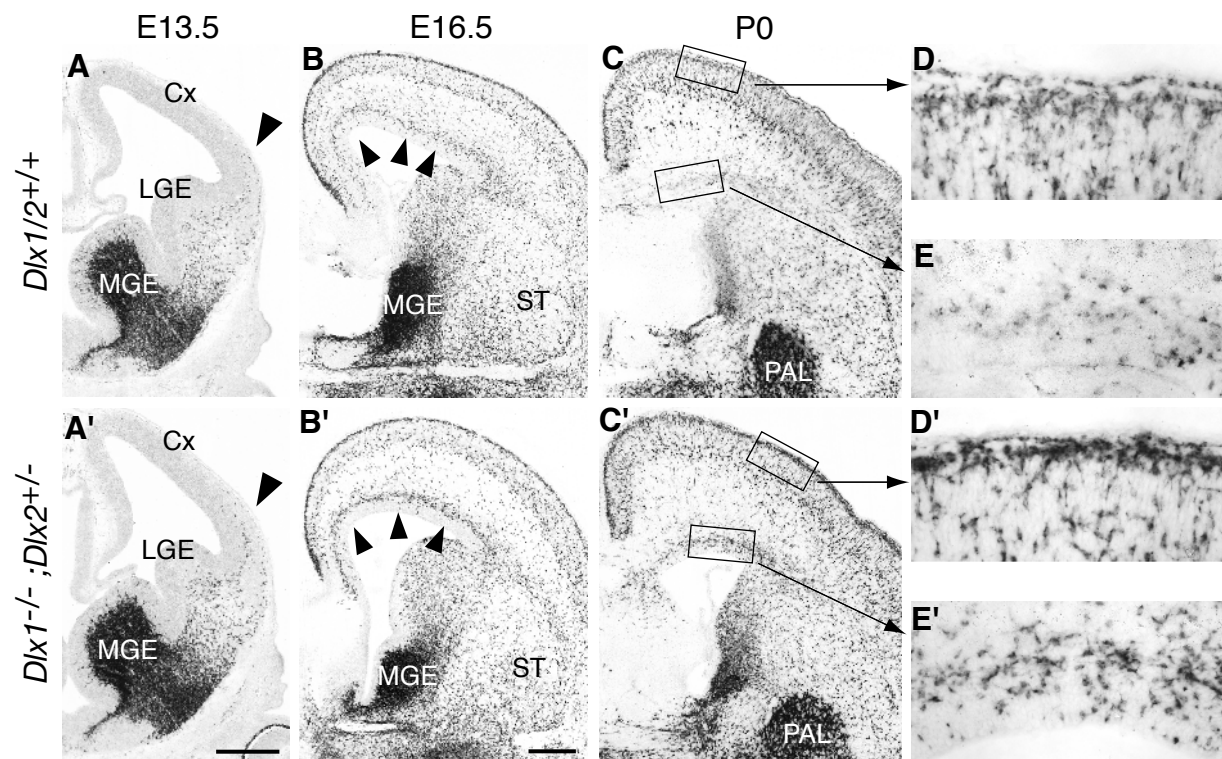



## Transcription factors

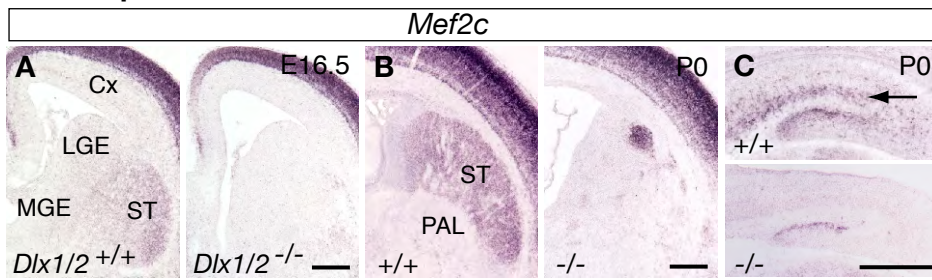

## Cell-surface receptors and cell adhesion molecules

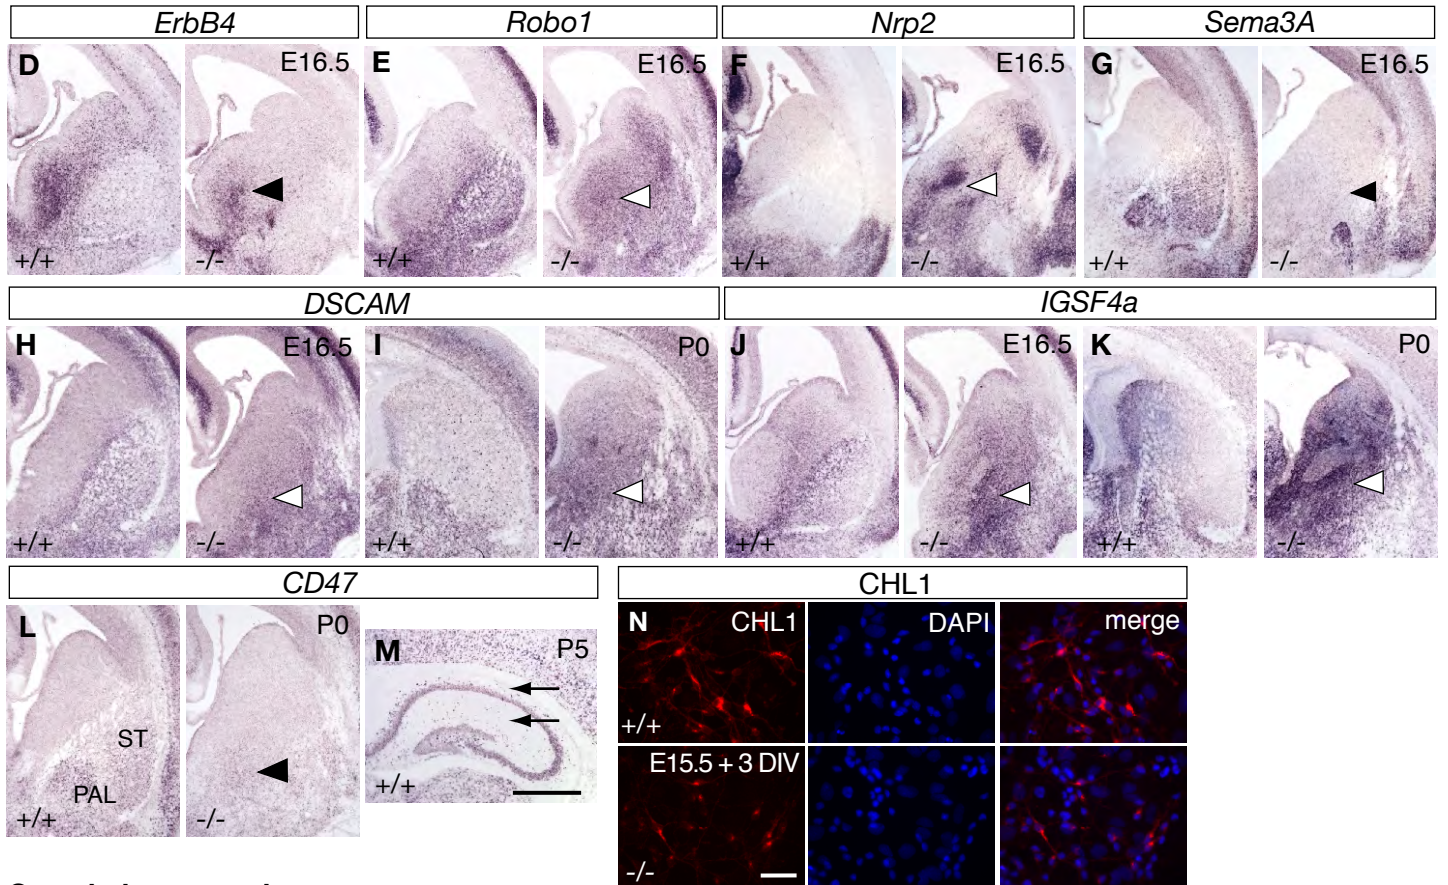

## Cytoskeleton regulators

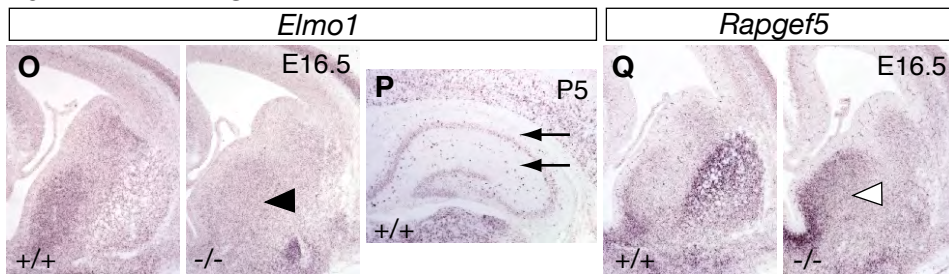

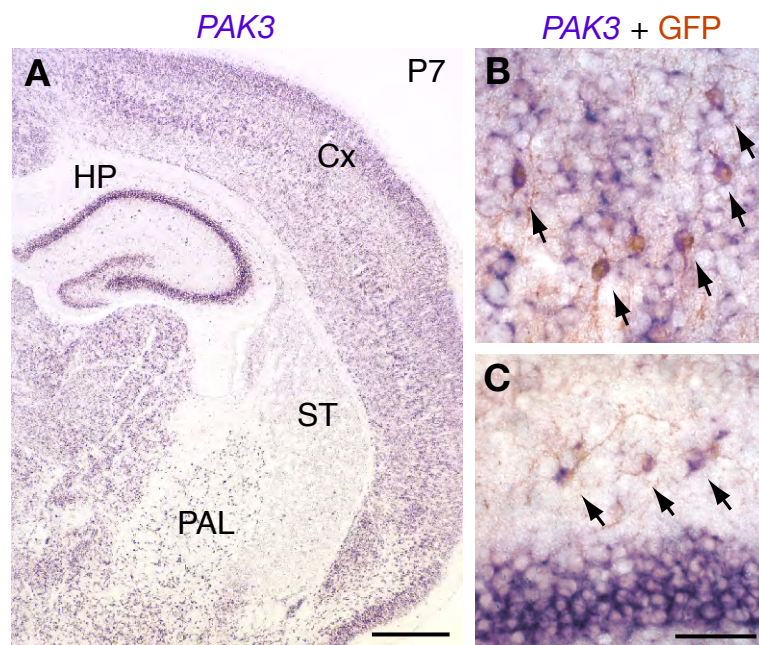

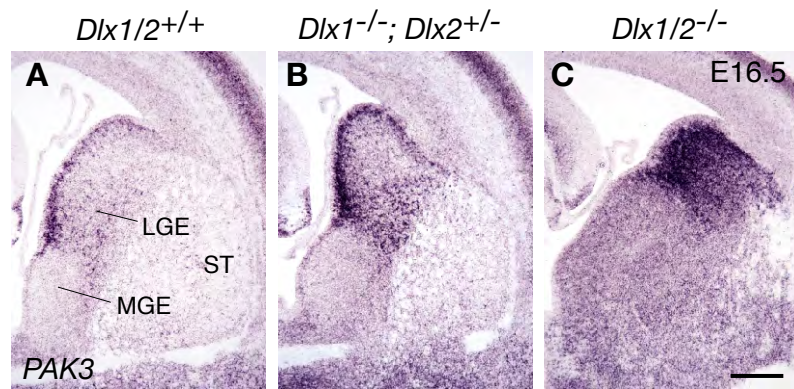



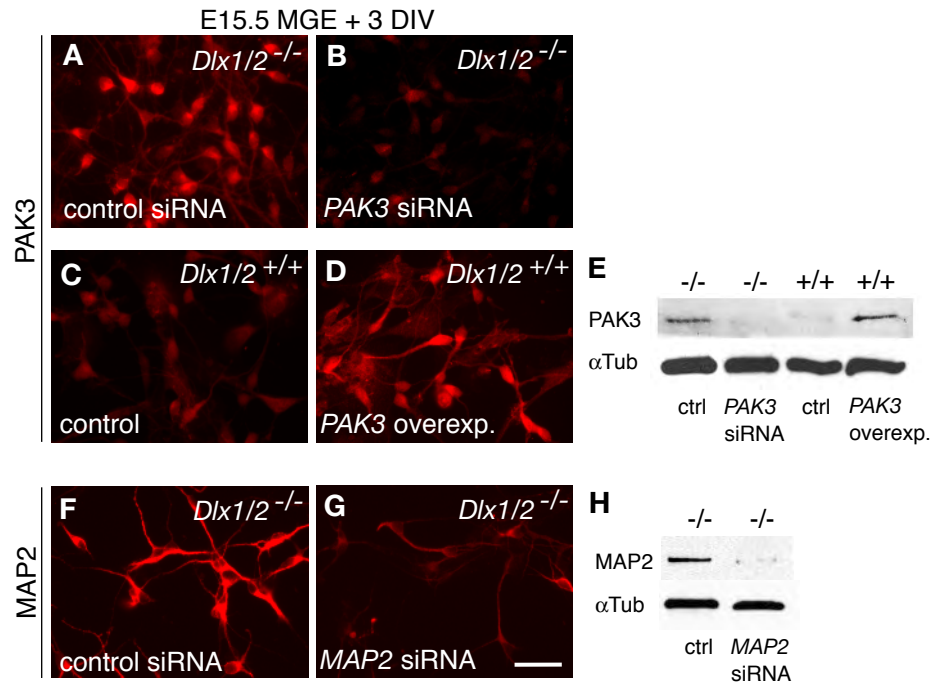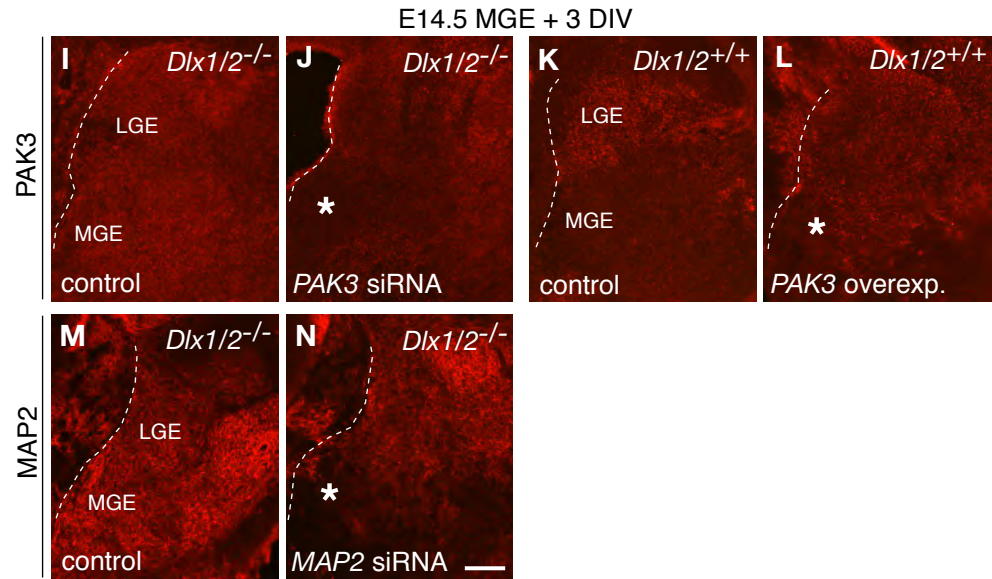

**Table 1.** List of selected genes that showed altered expression in microarrays comparing gene expression of MGE-derived cells from wild-type versus *Dlx1/2<sup>-/-</sup>* embryos. Arrows indicate up- or down-regulation in *Dlx1/2<sup>-/-</sup>*. Their biological functions, with emphasis to their known functions in neuronal differentiation, are briefly summarized. Confirmation of these data by mRNA *in situ* hybridization and/or immunocytochemistry can be found in Supplemental Figure S6.

| GENES                                                     | EXPRESSION | GENE DESCRIPTION                                                 | BIOLOGICAL FUNCTION                                                                          | REFERENCES                                                                          |
|-----------------------------------------------------------|------------|------------------------------------------------------------------|----------------------------------------------------------------------------------------------|-------------------------------------------------------------------------------------|
| <b>TRANSCRIPTION FACTORS</b>                              |            |                                                                  |                                                                                              |                                                                                     |
| <i>Mef2c</i>                                              | ↓          | myocyte enhancer factor 2C transcription factor                  | calcium-dependent regulation of cell differentiation and survival                            | Mckinsey <i>et al.</i> , 2002; Shalizi & Bonni, 2005                                |
| <b>CELL-SURFACE RECEPTORS AND CELL ADHESION MOLECULES</b> |            |                                                                  |                                                                                              |                                                                                     |
| <i>ErbB4</i>                                              | ↓          | v-erb-a erythroblastic leukemia viral oncogene homolog 4 (avian) | receptor protein-tyrosine kinase, cell cycle progression, cell differentiation, migration    | Buonanno & Fischbach, 2001; Flames <i>et al.</i> , 2004                             |
| <i>Robo1</i>                                              | ↑          | roundabout homolog 1 ( <i>Drosophila</i> )                       | receptor activity, axon guidance and branching, cell migration                               | Kidd <i>et al.</i> , 1998; Sang <i>et al.</i> , 2002; Andrews <i>et al.</i> , 2006  |
| <i>Nrp2</i>                                               | ↑          | neuropilin 2                                                     | semaphorin receptor activity, axon guidance, cell migration                                  | Giger <i>et al.</i> , 2000; Marin <i>et al.</i> , 2001                              |
| <i>DSCAM</i>                                              | ↑          | Down syndrome cell adhesion molecule, Ig superfamily             | homophilic cell adhesion, axon and dendrite guidance and branching, axon-target recognition  | Schmucker <i>et al.</i> , 2000; Chen <i>et al.</i> , 2006; Zhu <i>et al.</i> , 2006 |
| <i>IGSF4a</i>                                             | ↑          | immunoglobulin superfamily factor 4a                             | homophilic cell adhesion, synaptogenesis                                                     | Biederer <i>et al.</i> , 2002                                                       |
| <i>Cd47</i>                                               | ↓          | CD47 antigen, integrin-associated protein (IAP)                  | cell adhesion, neurite outgrowth, synapse associated protein                                 | Miyashita <i>et al.</i> , 2004; Ohnishi <i>et al.</i> , 2005                        |
| <i>Chl1</i>                                               | ↓          | cell adhesion molecule with homology to L1CAM                    | cell adhesion, neurite morphogenesis, migration                                              | Montag-Sallaz <i>et al.</i> , 2002; Demyanenko <i>et al.</i> , 2004                 |
| <b>SECRETED PROTEINS</b>                                  |            |                                                                  |                                                                                              |                                                                                     |
| <i>Reln</i>                                               | ↓          | reelin                                                           | cell adhesion, cellular morphogenesis, migration, synaptic function                          | Rice and Curran, 2001                                                               |
| <i>Sema3a</i>                                             | ↓          | semaphorin 3A                                                    | cell differentiation, axon guidance, negative regulation of axon extension                   | Polleux <i>et al.</i> , 1998, 2000; Marin <i>et al.</i> , 2001                      |
| <b>CYTOSKELETON REGULATORS</b>                            |            |                                                                  |                                                                                              |                                                                                     |
| <i>Elmo1</i>                                              | ↓          | engulfment and cell motility 1                                   | Rac activation, cytoskeletal regulation, cell migration                                      | Gumienny <i>et al.</i> , 2001; Katoh <i>et al.</i> , 2006                           |
| <i>Rapgef5</i>                                            | ↑          | Rap guanine nucleotide exchange factor (GEF) 5                   | small GTPase mediated signal transduction                                                    | Bithell <i>et al.</i> , 2003; Rossman <i>et al.</i> , 2005                          |
| <i>PAK3</i>                                               | ↑          | p21-activated serine/threonine kinase                            | cell-cycle progression, regulation of cytoskeletal dynamics, cell polarity, motility         | Bokoch, 2003; Hofmann <i>et al.</i> , 2004; Meng <i>et al.</i> , 2005               |
| <i>Gap43</i>                                              | ↑          | growth associated protein 43                                     | cell growth and differentiation, axonal growth                                               | Aigner <i>et al.</i> , 1995                                                         |
| <i>Mapt</i>                                               | ↑          | microtubule-associated protein tau                               | cytoskeletal regulatory protein binding, negative regulation of microtubule depolymerization | Dehmelt & Halpain, 2005                                                             |

## References

- Aigner, L., Arber, S., Kapfhammer, J.P., Laux, T., Schneider, C., Botteri, F., Brenner, H.R., and Caroni, P. (1995). Overexpression of the neural growth-associated protein GAP-43 induces nerve sprouting in the adult nervous system of transgenic mice. *Cell* **83**, 269-78.
- Andrews, W., Liapi, A., Plachez, C., Camurri, L., Zhang, J., Mori, S., Murakami, F., Parnavelas, J.G., Sundaresan, V., and Richards, L.J. (2006). Robo1 regulates the development of major axon tracts and interneuron migration in the forebrain. *Development* **133**, 2243-52.
- Biederer, T., Sara, Y., Mozhayeva, M., Atasoy, D., Liu, X., Kavalali, E.T., and Sudhof, T.C. (2002). SynCAM, a synaptic adhesion molecule that drives synapse assembly. *Science* **297**, 1525-31.
- Bithell, A., Alberta, J., Hornby, F., Stiles, C.D., and Williams, B.P. (2003). Expression of the guanine nucleotide exchange factor, *mrgef*, is regulated during the differentiation of specific subsets of telencephalic neurons. *Brain Res. Dev. Brain Res.* **146**, 107-18.
- Bokoch, G.M. (2003). Biology of the p21-activated kinases. *Annu. Rev. Biochem.* **72**, 743-81.
- Buonanno, A. and Fischbach, G.D. (2001). Neuregulin and ErbB receptor signaling pathways in the nervous system. *Curr. Opin. Neurobiol.* **11**, 287-296.
- Chen, B.E., Kondo, M., Garnier, A., Watson, F.L., Puettmann-Holgado, R., Lamar, D.R., and Schmucker, D. (2006). The molecular diversity of Dscam is functionally required for neuronal wiring specificity in *Drosophila*. *Cell* **125**, 607-20.
- Dehmelt, L., and Halpain, S. (2005). The MAP2/Tau family of microtubule-associated proteins. *Genome Biol.* **6**, 204.
- Demyanenko, G.P., Schachner, M., Anton, E., Schmid, R., Feng, G., Sanes, J., and Maness, P.F. (2004). Close homolog of L1 modulates area-specific neuronal positioning and dendrite orientation in the cerebral cortex. *Neuron* **44**, 423-37.
- Flames, N., Long, J.E., Garratt, A.N., Fischer, T.M., Gassmann, M., Birchmeier, C., Lai, C., Rubenstein, J.L., and Marin, O. (2004). Short- and long-range attraction of cortical GABAergic interneurons by neuregulin-1. *Neuron* **44**, 251-61.
- Giger, R.J., Cloutier, J.F., Sahay, A., Prinjha, R.K., Levengood, D.V., Moore, S.E., Pickering, S., Simmons, D., Rastan, S., Walsh, F.S., Kolodkin, A.L., Ginty, D.D., and Geppert, M. (2000). Neuropilin-2 is required *in vivo* for selective axon guidance responses to secreted semaphorins. *Neuron* **25**, 29-41.
- Gumienny, T.L., Brugnera, E., Tosello-Trampont, A.C., Kinchen, J.M., Haney, L.B., Nishiwaki, K., Walk, S.F., Nemergut, M.E., Macara, I.G., Francis, R., Schedl, T., Qin, Y., Van Aelst, L., Hengartner, M.O., and Ravichandran, K.S. (2001). CED-12/ELMO, a novel member of the CrkII/Dock180/Rac pathway, is required for phagocytosis and cell migration. *Cell* **107**, 27-41.
- Hofmann, C., Shepelev, M., and Chernoff, J. (2004). The genetics of Pak. *J. Cell. Sci.* **117**, 4343-54.
- Katoh, H., Fujimoto, S., Ishida, C., Ishikawa, Y., and Negishi, M. (2006). Differential distribution of *ELMO1* and *ELMO2* mRNAs in the developing mouse brain. *Brain Res.* **1073-1074**, 103-8.
- Kidd, T., Brose, K., Mitchell, K. J., Fetter, R. D., Tessier-Lavigne, M., Goodman, C. S. and Tear, G. (1998). Roundabout controls axon crossing of the CNS midline and defines a novel subfamily of evolutionarily conserved guidance receptors. *Cell* **92**, 205 - 215.
- Marin, O., Yaron, A., Bagri, A., Tessier-Lavigne, M., and Rubenstein J.L. (2001). Sorting of striatal and cortical interneurons regulated by semaphorin-neuropilin interactions. *Science* **293**, 872-5.
- McKinsey, T.A., Zhang, C.L., and Olson, E.N. (2002). MEF2: a calcium-dependent regulator of cell division, differentiation and death. *Trends Biochem. Sci.* **27**, 40-7.
- Meng, J., Meng, Y., Hanna, A., Janus, C., and Jia, Z. (2005). Abnormal long-lasting synaptic plasticity and cognition in mice lacking the mental retardation gene *Pak3*. *J. Neurosci.* **25**, 6641-50.
- Miyashita, M., Ohnishi, H., Okazawa, H., Tomonaga, H., Hayashi, A., Fujimoto, T.T., Furuya, N., and Matozaki, T. (2004). Promotion of neurite and filopodium formation by CD47: roles of integrins, Rac, and Cdc42. *Mol. Biol. Cell* **15**, 3950-63.
- Montag-Sallaz, M., Schachner, M., and Montag, D. (2002). Misguided axonal projections, neural cell adhesion molecule 180 mRNA upregulation, and altered behavior in mice deficient for the close homolog of L1. *Mol. Cell Biol.* **22**, 7967-81.
- Ohnishi, H., Kaneko, Y., Okazawa, H., Miyashita, M., Sato, R., Hayashi, A., Tada, K., Nagata, S., Takahashi, M., and Matozaki, T. (2005). Differential localization of Src homology 2 domain-containing protein tyrosine phosphatase substrate-1 and CD47 and its molecular mechanisms in cultured hippocampal neurons. *J. Neurosci.* **25**, 2702-11.
- Polleux, F., Giger, R.J., Ginty, D.D., Kolodkin, A.L., and Ghosh, A. (1998). Patterning of cortical efferent projections by semaphorin-neuropilin interactions. *Science* **282**, 1904-6.
- Polleux, F., Morrow, T., and Ghosh, A. (2000). Semaphorin 3A is a chemoattractant for cortical apical dendrites. *Nature* **404**, 567-73.
- Rice, D.S., and Curran, T. (2001). Role of the reelin signaling pathway in central nervous system development. *Annu. Rev. Neurosci.* **24**, 1005-39.
- Rossmann, K.L., Der, C.J., and Sondek, J. (2005) GEF means go: turning on RHO GTPases with guanine nucleotide-exchange factors. *Nat. Rev. Mol. Cell Biol.* **6**, 167-80.
- Sang, Q., Wu, J., Rao, Y., Hsueh, Y.P. and Tan, S.S. (2002). Slit promotes branching and elongation of neurites of interneurons but not projection neurons from the developing telencephalon. *Mol. Cell Neurosci.* **21**, 250 -265.
- Schmucker, D., Clemens, J.C., Shu, H., Worby, C.A., Xiao, J., Muda, M., Dixon, J.E., and Zipursky, S.L. (2000). *Drosophila* Dscam is an axon guidance receptor exhibiting extraordinary molecular diversity. *Cell* **101**, 671-84.
- Shalizi, A.K., and Bonni, A. (2005). Brawn for Brains: The Role of MEF2 Proteins in the Developing Nervous System. *Curr. Top. Dev. Biol.* **69**, 239-66.
- Zhu, H., Hummel, T., Clemens, J.C., Berdnik, D., Zipursky, S.L., and Luo, L. (2006). Dendritic patterning by Dscam and synaptic partner matching in the *Drosophila* antennal lobe. *Nat. Neurosci.* **9**, 349-55.
